# Supplementary material for: Intratumoural spatial distribution of S100B + folliculostellate cells is associated with proliferation and expression of FSH and ERα in gonadotroph tumours
Source: PubMed Central journal article supplement (PMC8827287; doi:10.1186/s40478-022-01321-y), 2022-02-09

**A**

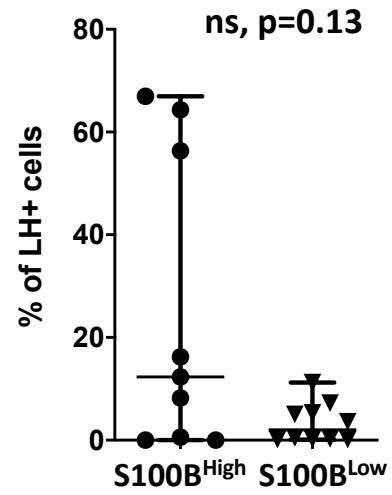

**B**

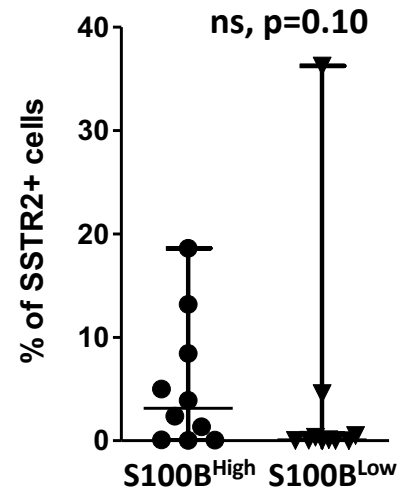

Supplement: 40478_2022_1321_MOESM4_ESM.pdf [file 40478_2022_1321_MOESM4_ESM.pdf]
